# Supplementary material for: A heat and force locating sensor with nanoscale precision: a knitted graphene sheet
Source: Royal Society of Chemistry journal article supplement (doi:10.1039/d0nr08829c), 2021-01-01
Supplement: d0nr08829c6.pdf [file d0nr08829c6.pdf]

## Supporting Information

### **A heat and force locating sensor in nanoscale precision: A knitted graphene sheet**

Ning Wei<sup>a, #</sup>, Zhen Li<sup>a, #</sup>, Zhi-Hui Li<sup>b</sup>, Chao Zhang<sup>c</sup>, Chunlei Wang<sup>d</sup>, Junhua Zhao<sup>a, \*</sup>,  
Kun Cai<sup>e, \*</sup>

<sup>a</sup>*Jiangsu Key Laboratory of Advanced Food Manufacturing Equipment and Technology, Jiangnan University, 214122 Wuxi, China*

<sup>b</sup>*China Aerodynamics Research and Development Center, P.O.Box 211, Mianyang 621000, China; National Laboratory for Computational Fluid Dynamics, BUAA, No.37 Xueyuan Road, Beijing 100191, China*

<sup>c</sup>*School of Water Conservancy Engineering, Zhengzhou University, Zhengzhou, 450001, China*

<sup>d</sup>*Shanghai Synchrotron Radiation Facility, Shanghai Advanced Research Institute, Chinese Academy of Sciences, Shanghai 201204, China.*

<sup>e</sup>*School of science, Harbin Institute of Technology, Shen Zhen 518055, China; School of Engineering, RMIT University, Bundoora, VIC 3083, Australia*

#### AUTHOR INFORMATION

<sup>#</sup>Ning Wei and Zhen Li contributed equally to this work and should be regarded as co-first authors.

\*Corresponding author. E-mail address: junhua.zhao@163.com (Junhua Zhao)

\*Corresponding author. E-mail address: kun.cai@rmit.edu.au (Kun Cai)

(a) Top view

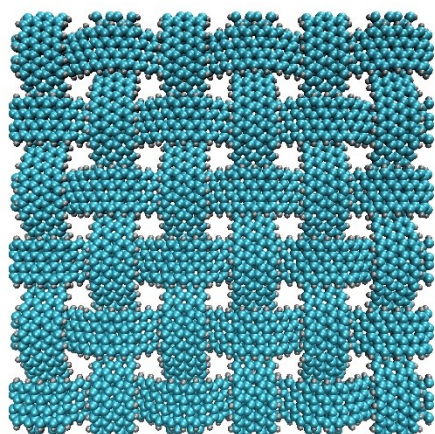

(b)

Side view

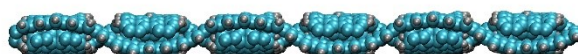

(c) Perspective view

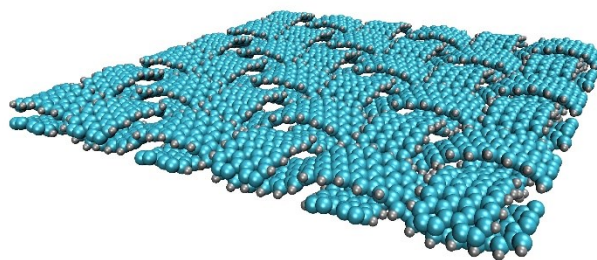

Figure S1. Top, side and perspective views of KGS (6,6) with edges terminated by hydrogen atoms.

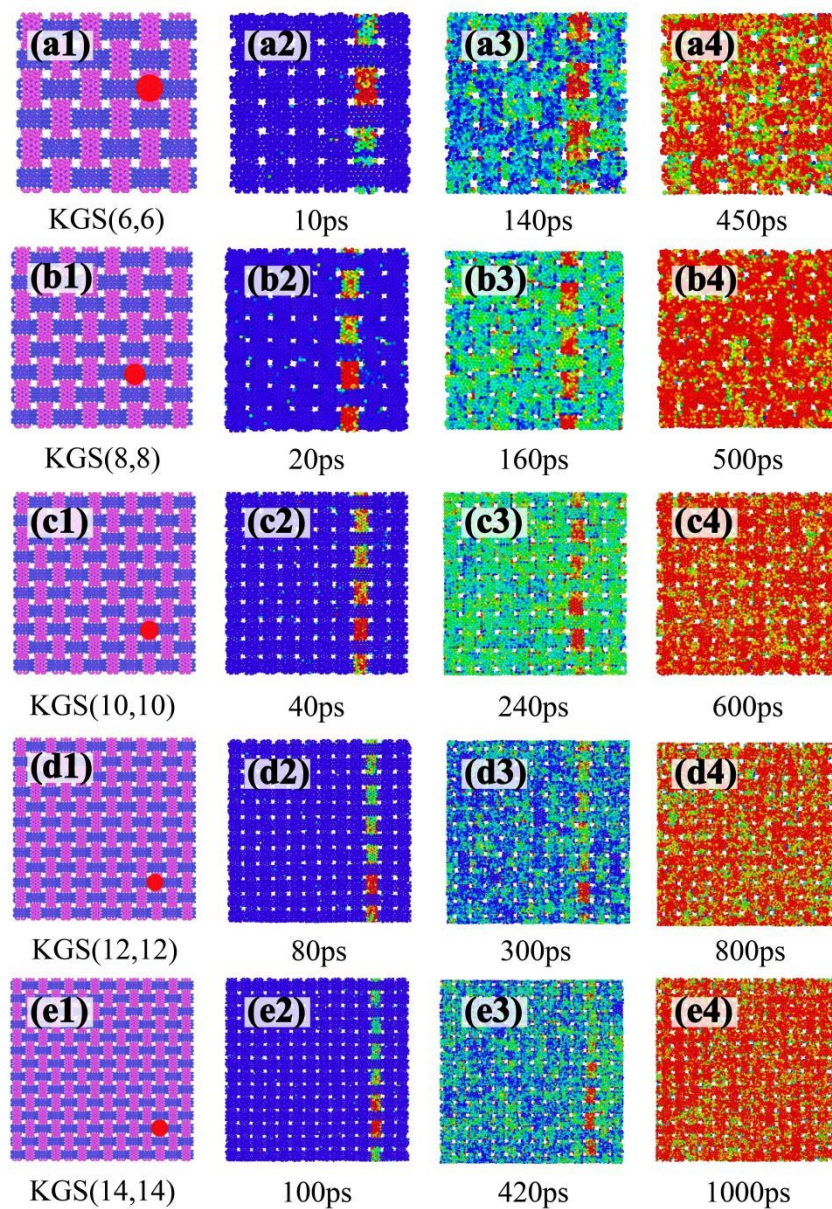

Figure S2. Atomic temperature distribution on five KGS models under contacting with a small heat source.

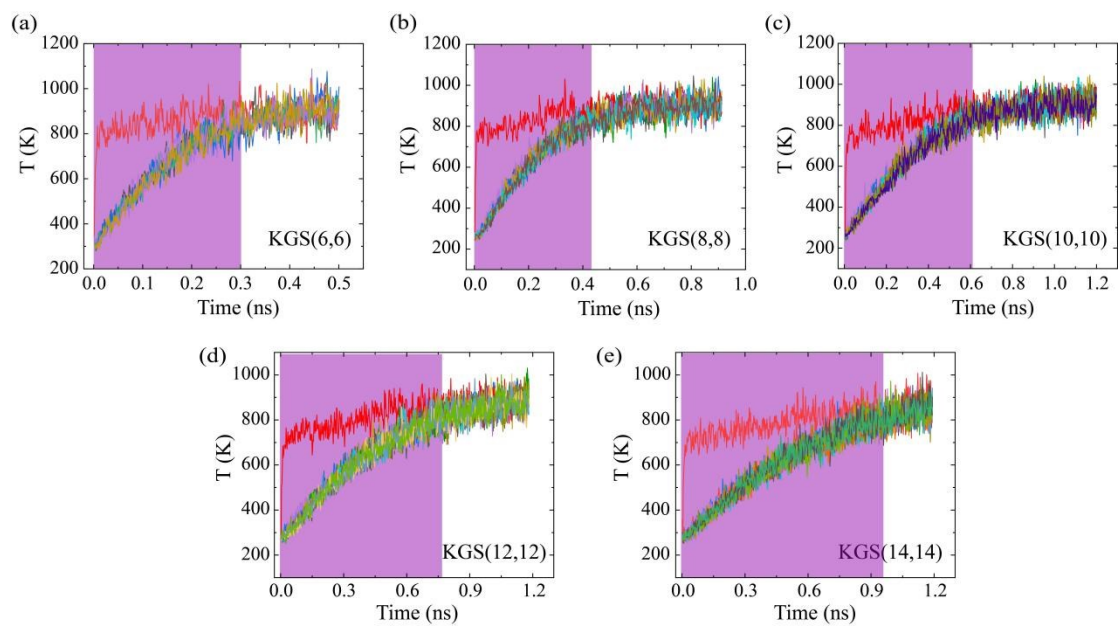

Fig. S3. Temperature variation of GNRs in KGS vs. simulation time with a small heat source.

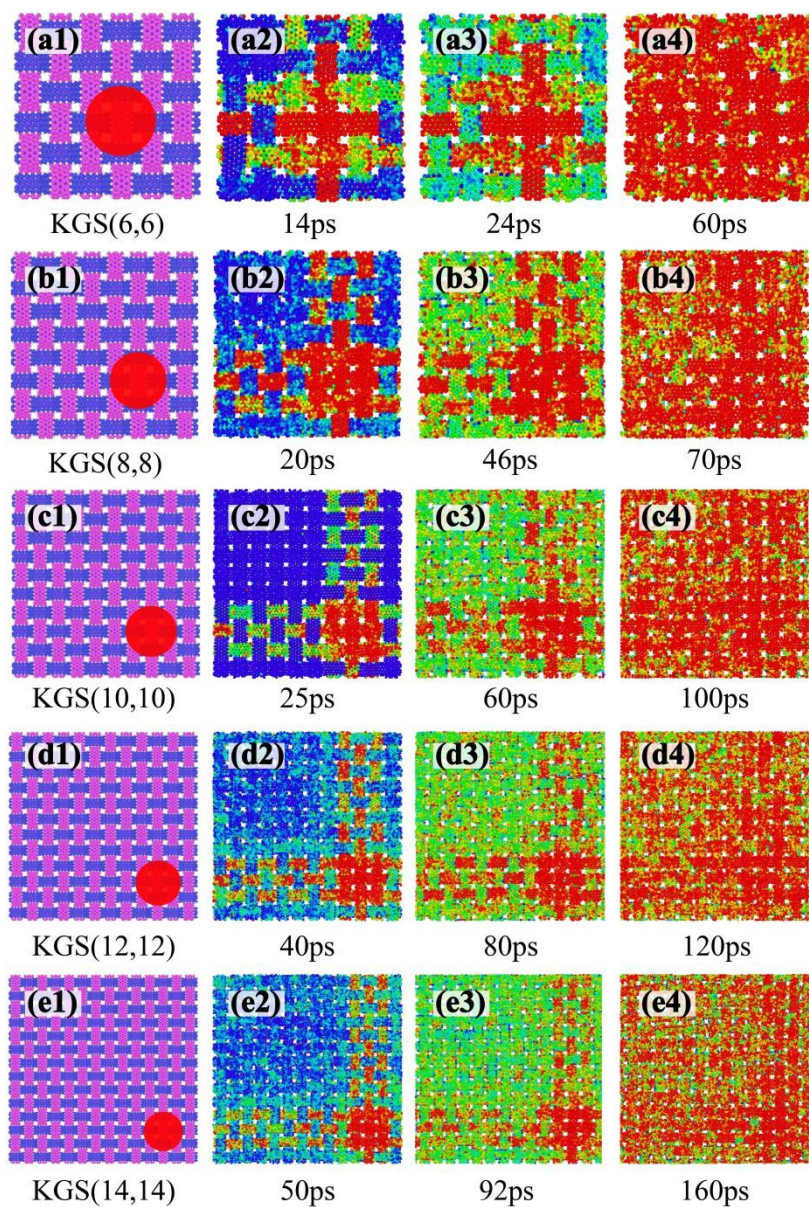

Figure S4. Atomic temperature distribution on KGS models under contacting with a large heat source.

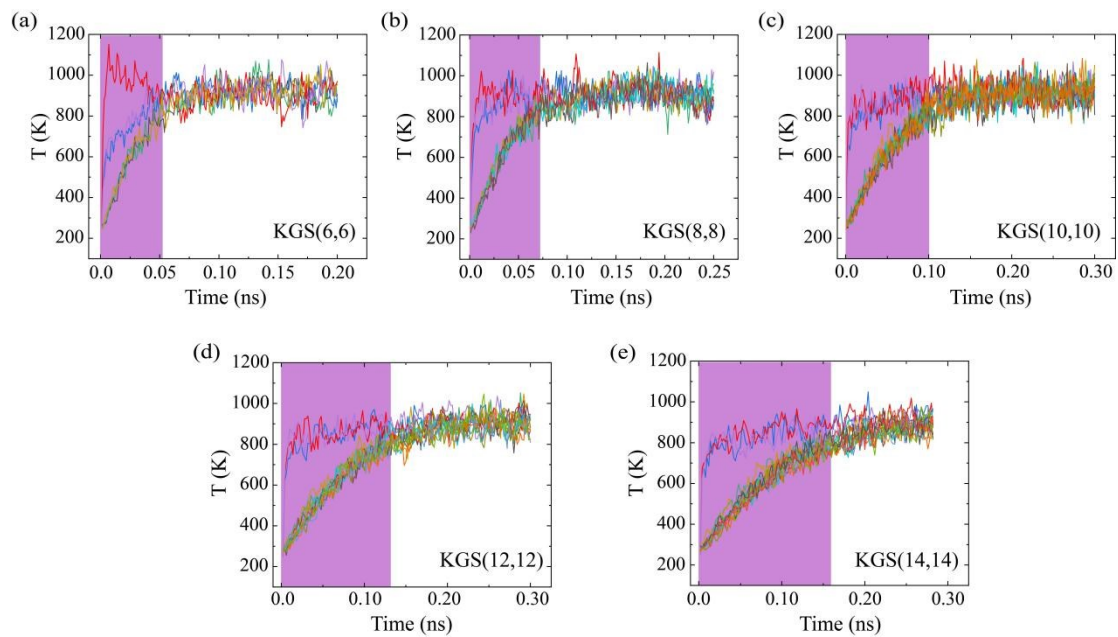

Fig. S5. Temperature variation of GNRs in KGS models vs. simulation time using a large heat source.

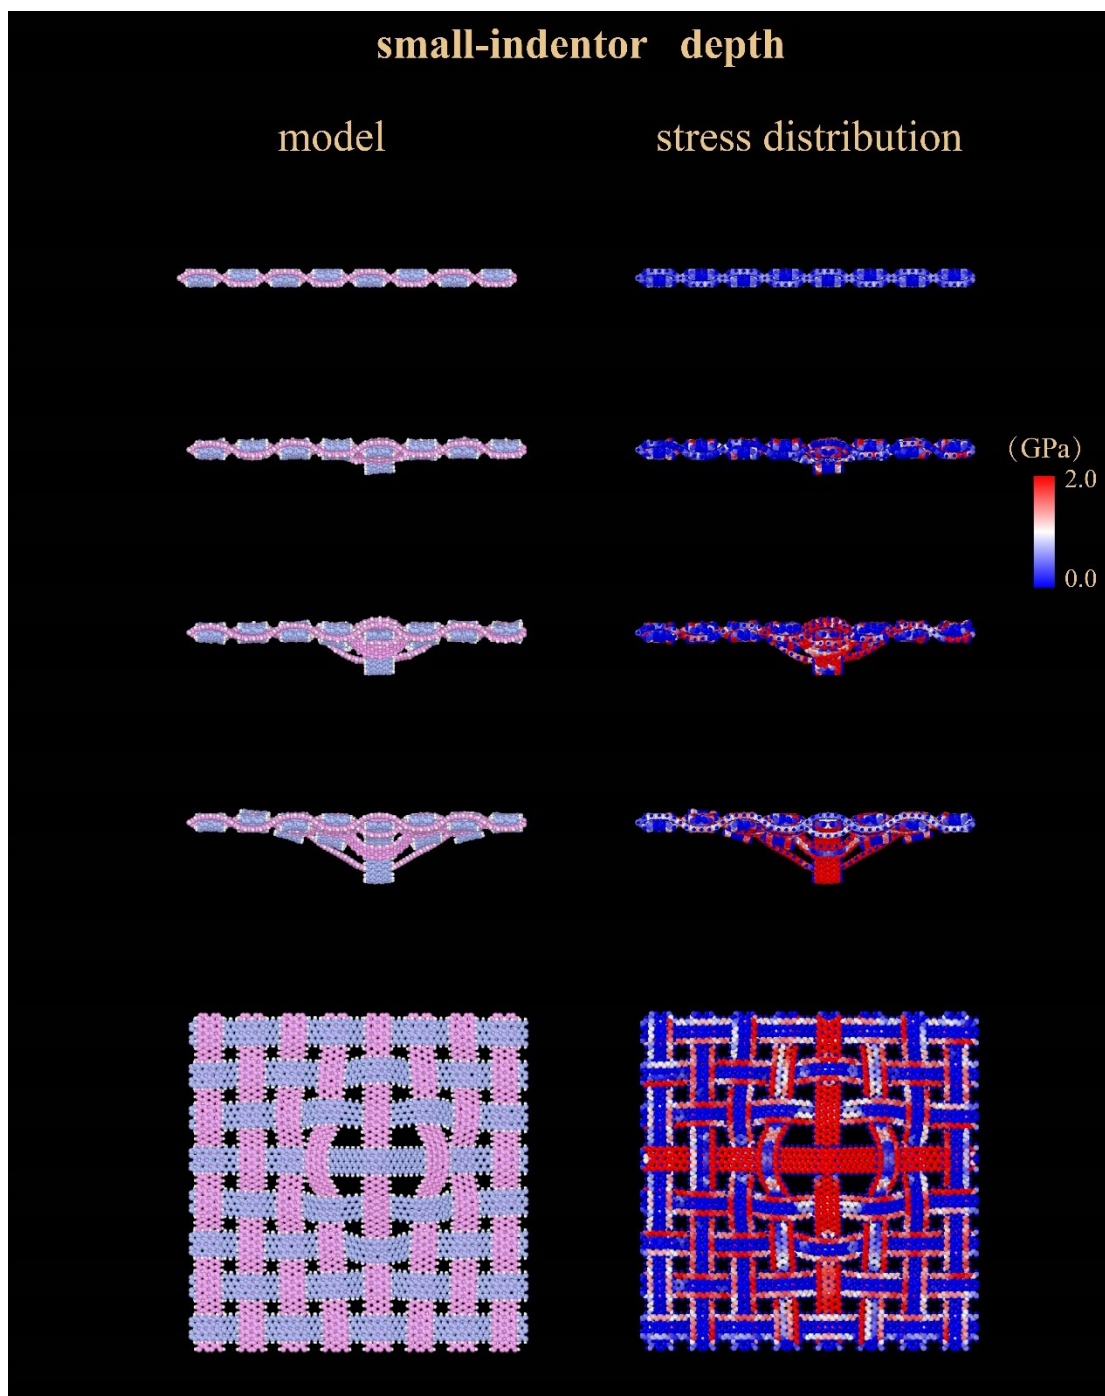

Fig. S6. Deformation and atomic stress distribution of KGS (8, 8) under indentation using a small indenter.

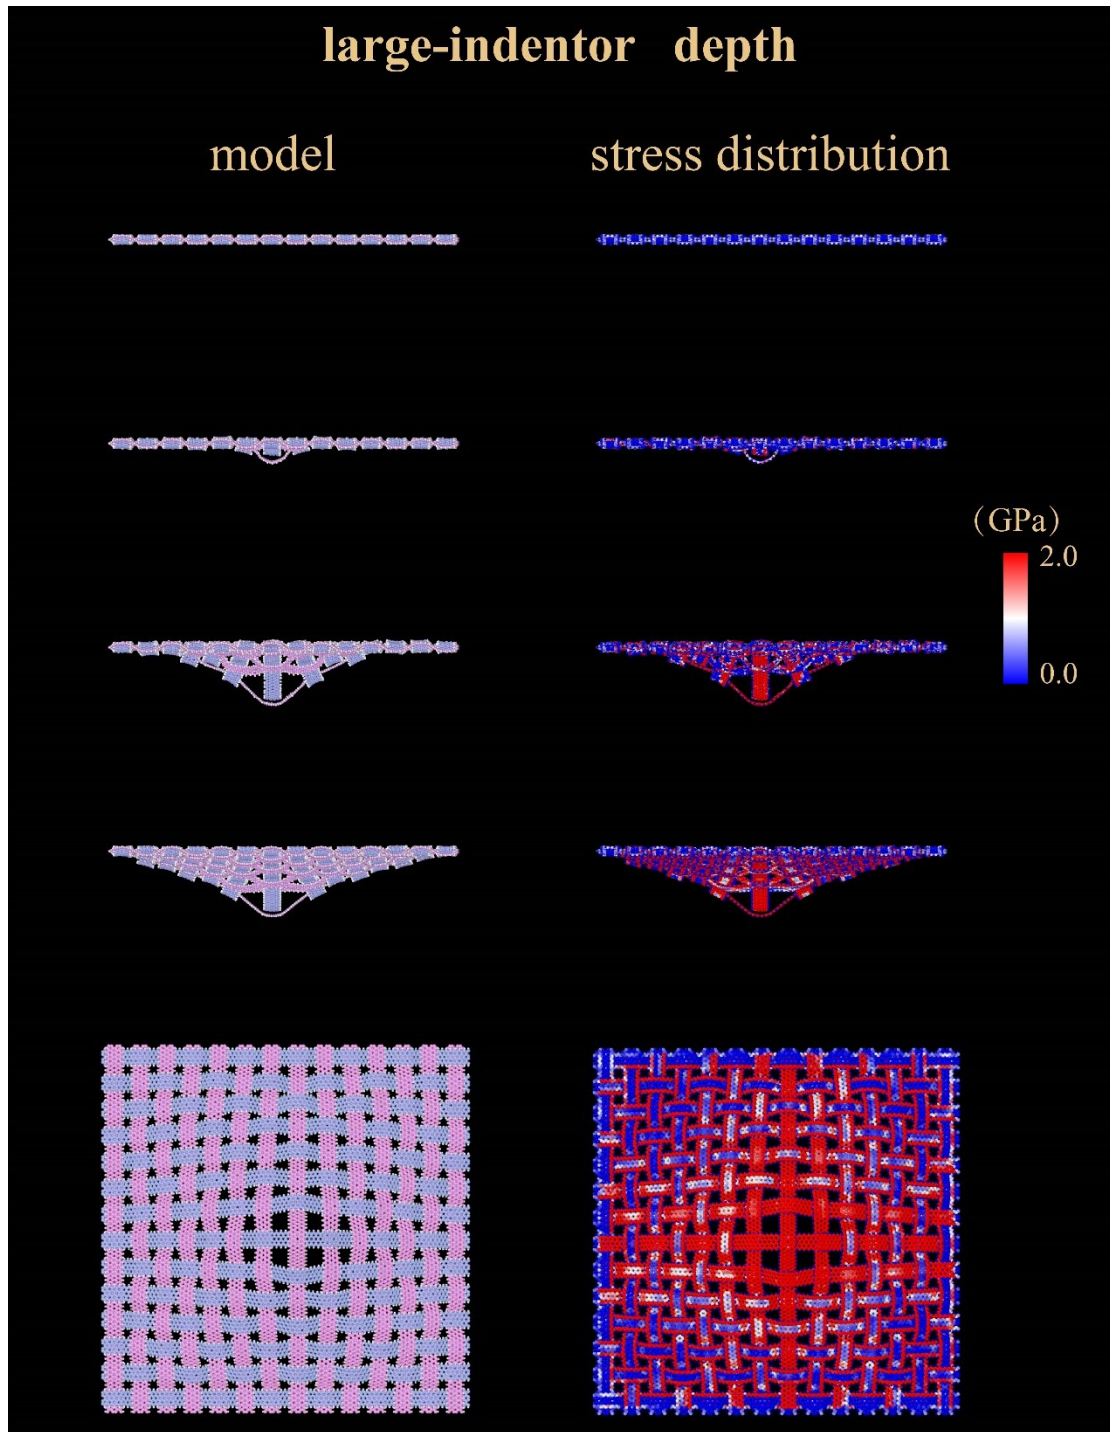

Fig. S7. Deformation and atomic stress distribution of KGS (14, 14) under indentation using a large indentor.



Table 1. Model information of KGSs and their corresponding  $t_{\text{window}}$ .

| Model<br>KGS(M,N) | No. Atom<br>(count) | $L$<br>(nm) | SHS $t_{\text{window}}$<br>(ns) | LHS $t_{\text{window}}$<br>(ns) |
|-------------------|---------------------|-------------|---------------------------------|---------------------------------|
| KGS(6,6)          | 4320                | 7.6         | 0.3                             | 0.052                           |
| KGS(8,8)          | 7680                | 10.07       | 0.434                           | 0.074                           |
| KGS(10,10)        | 12000               | 12.59       | 0.61                            | 0.1                             |
| KGS(12,12)        | 17280               | 15.11       | 0.768                           | 0.132                           |
| KGS(14,14)        | 23520               | 17.64       | 0.96                            | 0.16                            |
