# Supplementary figures and images for: A heat and force locating sensor with nanoscale precision: a knitted graphene sheet
Source: Royal Society of Chemistry journal article supplement (doi:10.1039/d0nr08829c), 2021-01-01

(a) Top view

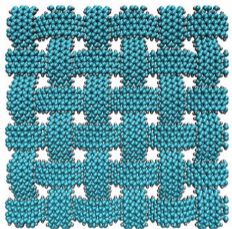

(b)

Side view

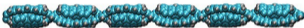

(c) Perspective view

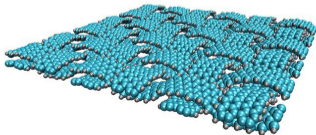

Supplement: d0nr08829c1.pdf [file d0nr08829c1.pdf]

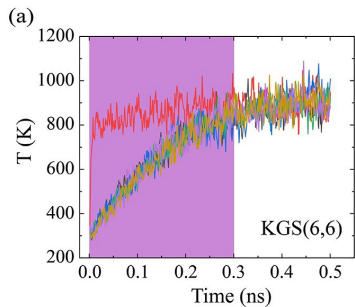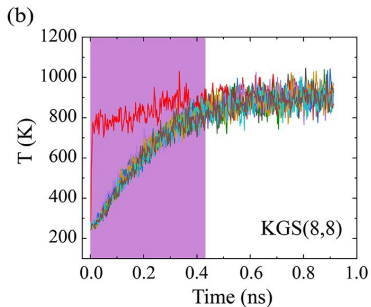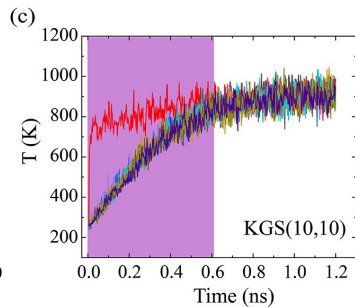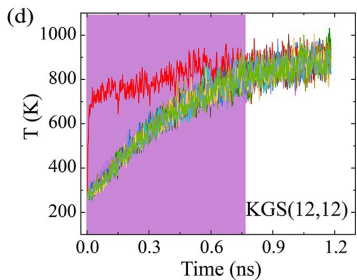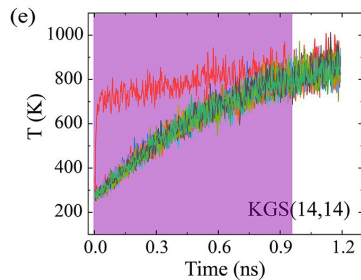

Supplement: d0nr08829c2.pdf [file d0nr08829c2.pdf]

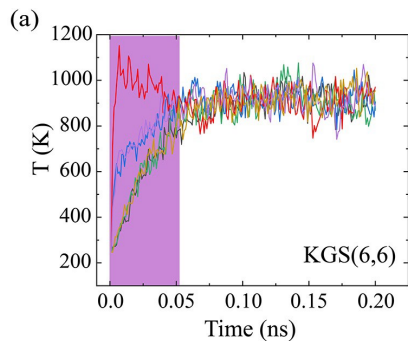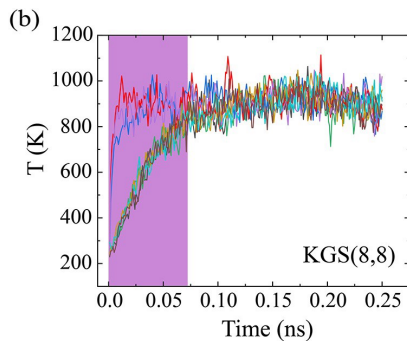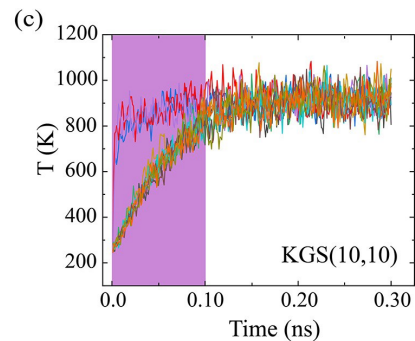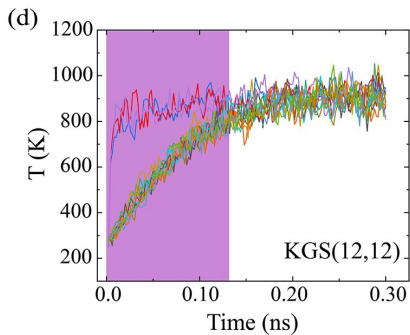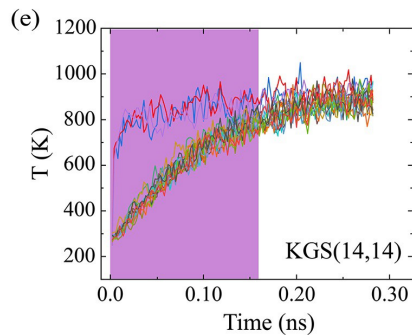

Supplement: d0nr08829c3.pdf [file d0nr08829c3.pdf]

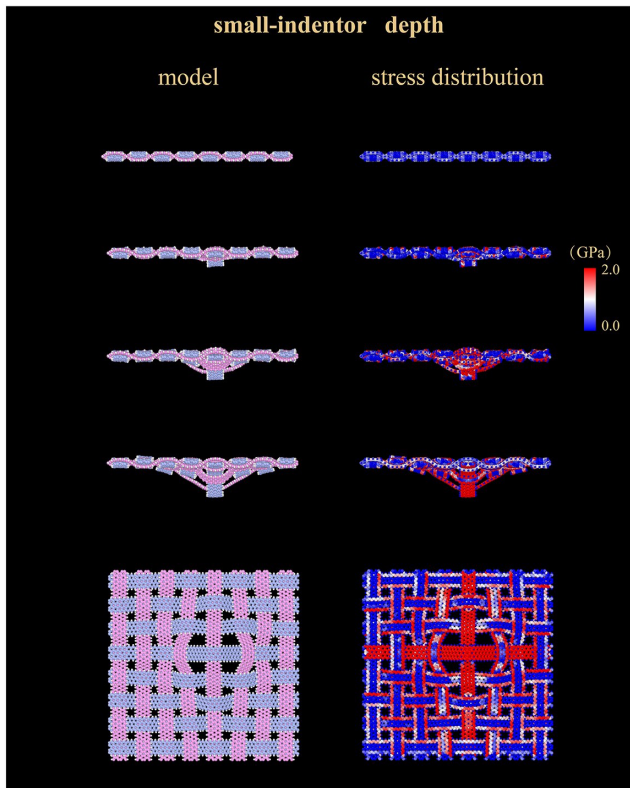

Supplement: d0nr08829c4.pdf [file d0nr08829c4.pdf]

## large-indentor depth

model

stress distribution

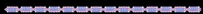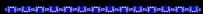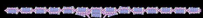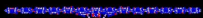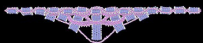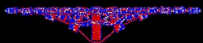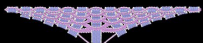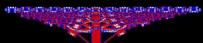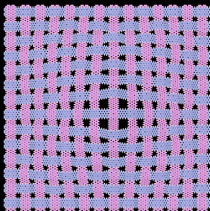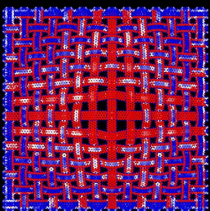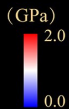

Supplement: d0nr08829c5.pdf [file d0nr08829c5.pdf]
